# Supplementary material
Source: PubMed Central journal article supplement (PMC8482809)
Supplement: NEJMoa2106599_disclosures.pdf [file NEJMoa2106599_disclosures.pdf]

**Disclosure Purpose:** 21-06599

## Summary of Interests

**Company or Organization**

| Entity                                                     | Type             | Interest Held By |
|------------------------------------------------------------|------------------|------------------|
| <a href="#">Centers for Disease Control and Prevention</a> | Grant / Contract | Self             |

*Recipient Name:* Deverick Anderson  
*Grant / Contract Description:* CDC Prevention Epicenters Program  
*Additional Information:*

*Recipient Type:* Institution  
*Grant / Contract Purpose:* Research

## Additional Questions:

- Are there other relationships or activities that readers could perceive to have influenced, or that give the appearance of potentially influencing, what you wrote in the submitted work?**  
No.
- What is the manuscript title?**  
Effectiveness of the Pfizer-BioNTech and Moderna COVID-19 Vaccines among Healthcare Personnel in the United States, January - May 2021
- Are you the corresponding author?**  
No.

## Certification

I certify that the information provided in this disclosure is complete and accurate.

Disclosure Purpose: 21-06599

Summary of Interests

**Company or Organization**

| Entity                                                                                                                                                                                                                                                                                                                                     | Type             | Interest Held By                                                                                          |
|--------------------------------------------------------------------------------------------------------------------------------------------------------------------------------------------------------------------------------------------------------------------------------------------------------------------------------------------|------------------|-----------------------------------------------------------------------------------------------------------|
| Centers for Disease Control and Prevention                                                                                                                                                                                                                                                                                                 | Grant / Contract | Other - N/A                                                                                               |
| <i>Recipient Name:</i> Colorado Department of Public Health and Environment<br><i>Grant / Contract Description:</i><br><i>Additional Information:</i> The Centers for Disease Control and Prevention provides funding to the Colorado Department of Public Health and Environment via the Emerging Infections Program to conduct this work |                  | <i>Recipient Type:</i> Institution<br><i>Grant / Contract Purpose:</i> Other - public health surveillance |

Additional Questions:

- Are there other relationships or activities that readers could perceive to have influenced, or that give the appearance of potentially influencing, what you wrote in the submitted work?**  
No.
- What is the manuscript title?**  
Effectiveness of the Pfizer-BioNTech and Moderna COVID-19 Vaccines among Healthcare Personnel in the U.S., January – April 2021
- Are you the corresponding author?**  
No.

Certification

I certify that the information provided in this disclosure is complete and accurate.

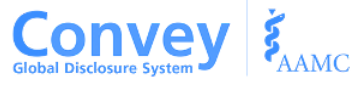

**Disclosure Purpose:** 21-06599

Summary of Interests

I do not have any interests to disclose at this time.

Additional Questions:

- 1. **Are there other relationships or activities that readers could perceive to have influenced, or that give the appearance of potentially influencing, what you wrote in the submitted work?**  
No.
- 2. **What is the manuscript title?**  
Effectiveness of the Pfizer-BioNTech and Moderna COVID-19 Vaccines among Healthcare Personnel in the United States, January - May 2021
- 3. **Are you the corresponding author?**  
No.

Certification

I certify that the information provided in this disclosure is complete and accurate.

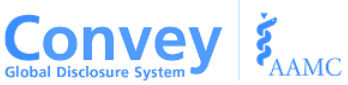

**Disclosure Purpose:** 21-06599

### Summary of Interests

I do not have any interests to disclose at this time.

### Additional Questions:

- Are there other relationships or activities that readers could perceive to have influenced, or that give the appearance of potentially influencing, what you wrote in the submitted work?**  
No.
- What is the manuscript title?**  
Effectiveness of the Pfizer-BioNTech and Moderna COVID-19 Vaccines among Healthcare Personnel in the United States, January-May 2021
- Are you the corresponding author?**  
No.

### Certification

I certify that the information provided in this disclosure is complete and accurate.

**Disclosure Purpose:** 21-06599

Summary of Interests

I do not have any interests to disclose at this time.

Additional Questions:

- 1. **Are there other relationships or activities that readers could perceive to have influenced, or that give the appearance of potentially influencing, what you wrote in the submitted work?**  
No.
- 2. **What is the manuscript title?**  
Effectiveness of the Pfizer-BioNTech and Moderna COVID-19 Vaccines among Healthcare Personnel in the United States, January - May 2021
- 3. **Are you the corresponding author?**  
No.

Certification

I certify that the information provided in this disclosure is complete and accurate.

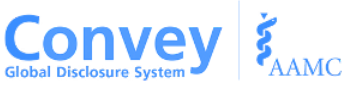

**Disclosure Purpose:** 21-06599

**Summary of Interests**

I do not have any interests to disclose at this time.

**Additional Questions:**

- 1. **Are there other relationships or activities that readers could perceive to have influenced, or that give the appearance of potentially influencing, what you wrote in the submitted work?**  
No.
- 2. **What is the manuscript title?**  
Effectiveness of the Pfizer-BioNTech and Moderna COVID-19 Vaccines among Healthcare Personnel in the United States, January - May 2021
- 3. **Are you the corresponding author?**  
No.

**Certification**

I certify that the information provided in this disclosure is complete and accurate.

**Disclosure Purpose:** 21-06599

**Summary of Interests**

I do not have any interests to disclose at this time.

**Additional Questions:**

- Are there other relationships or activities that readers could perceive to have influenced, or that give the appearance of potentially influencing, what you wrote in the submitted work?**  
No.
- What is the manuscript title?**  
Effectiveness of the Pfizer-BioNTech and Moderna COVID-19 Vaccines among Healthcare Personnel in the United States, January - May 2021
- Are you the corresponding author?**  
No.

**Certification**

I certify that the information provided in this disclosure is complete and accurate.

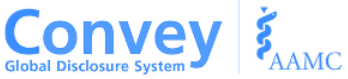

**Disclosure Purpose:** 21-06599

Summary of Interests

I do not have any interests to disclose at this time.

Additional Questions:

- 1. **Are there other relationships or activities that readers could perceive to have influenced, or that give the appearance of potentially influencing, what you wrote in the submitted work?**  
No.
- 2. **What is the manuscript title?**  
Effectiveness of the Pfizer-BioNTech and Moderna COVID-19 Vaccines among Healthcare Personnel in the United States, January - May 2021
- 3. **Are you the corresponding author?**  
No.

Certification

I certify that the information provided in this disclosure is complete and accurate.

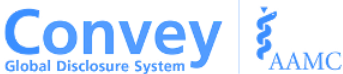



**Disclosure Purpose:** 21-06599

Summary of Interests

I do not have any interests to disclose at this time.

Additional Questions:

- Are there other relationships or activities that readers could perceive to have influenced, or that give the appearance of potentially influencing, what you wrote in the submitted work?**  
No.
- What is the manuscript title?**  
Effectiveness of the Pfizer-BioNTech and Moderna COVID-19 Vaccines among Healthcare Personnel in the United States, January - May 2021
- Are you the corresponding author?**  
No.

Certification

I certify that the information provided in this disclosure is complete and accurate.

**Disclosure Purpose:** 21-06599

**Summary of Interests**

I do not have any interests to disclose at this time.

**Additional Questions:**

- Are there other relationships or activities that readers could perceive to have influenced, or that give the appearance of potentially influencing, what you wrote in the submitted work?**  
No.
- What is the manuscript title?**  
Effectiveness of the Pfizer-BioNTech and Moderna COVID-19 Vaccines among Healthcare Personnel in the United States, January - May 2021
- Are you the corresponding author?**  
No.

**Certification**

I certify that the information provided in this disclosure is complete and accurate.

**Disclosure Purpose:** 21-06599

**Summary of Interests**

I do not have any interests to disclose at this time.

**Additional Questions:**

- 1. **Are there other relationships or activities that readers could perceive to have influenced, or that give the appearance of potentially influencing, what you wrote in the submitted work?**  
No.
- 2. **What is the manuscript title?**  
Effectiveness of the Pfizer-BioNTech and Moderna COVID-19 Vaccines among Healthcare Personnel in the United States, January - May 2021
- 3. **Are you the corresponding author?**  
No.

**Certification**

I certify that the information provided in this disclosure is complete and accurate.

**Disclosure Purpose:** 21-06599

### Summary of Interests

I do not have any interests to disclose at this time.

### Additional Questions:

- Are there other relationships or activities that readers could perceive to have influenced, or that give the appearance of potentially influencing, what you wrote in the submitted work?**  
No.
- What is the manuscript title?**  
Effectiveness of the Pfizer-BioNTech and Moderna COVID-19 Vaccines among Healthcare Personnel in the United States, January - May 2021
- Are you the corresponding author?**  
No.

### Certification

I certify that the information provided in this disclosure is complete and accurate.

Disclosure Purpose: 21-06599

Summary of Interests

**Company or Organization**

| Entity                                                                                                | Type             | Interest Held By                          |
|-------------------------------------------------------------------------------------------------------|------------------|-------------------------------------------|
| Pfizer                                                                                                | Grant / Contract | Other - University                        |
| <i>Recipient Name:</i> Emory University                                                               |                  | <i>Recipient Type:</i> Institution        |
| <i>Grant / Contract Description:</i> Grant funding to perform surveillance for C. difficile infection |                  | <i>Grant / Contract Purpose:</i> Research |
| <i>Additional Information:</i>                                                                        |                  |                                           |

Additional Questions:

- Are there other relationships or activities that readers could perceive to have influenced, or that give the appearance of potentially influencing, what you wrote in the submitted work?**  
No.
- What is the manuscript title?**  
Pfizer-BioNTech and Moderna COVID-19 Vaccines among Healthcare Personnel in the United States, January - May 2021
- Are you the corresponding author?**  
No.

Certification

I certify that the information provided in this disclosure is complete and accurate.

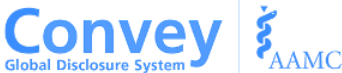

**Disclosure Purpose:** 21-06599

**Summary of Interests**

I do not have any interests to disclose at this time.

**Additional Questions:**

- 1. **Are there other relationships or activities that readers could perceive to have influenced, or that give the appearance of potentially influencing, what you wrote in the submitted work?**  
No.
- 2. **What is the manuscript title?**  
Effectiveness of the Pfizer-BioNTech and Moderna COVID-19 Vaccines among Healthcare Personnel in the United States, January - May 2021
- 3. **Are you the corresponding author?**  
No.

**Certification**

I certify that the information provided in this disclosure is complete and accurate.

**Disclosure Purpose:** 21-06599

Summary of Interests

I do not have any interests to disclose at this time.

Additional Questions:

- 1. **Are there other relationships or activities that readers could perceive to have influenced, or that give the appearance of potentially influencing, what you wrote in the submitted work?**  
No.
- 2. **What is the manuscript title?**  
Effectiveness of the Pfizer-BioNTech and Moderna COVID-19 Vaccines among Healthcare Personnel in the United States, January - May 2021
- 3. **Are you the corresponding author?**  
No.

Certification

I certify that the information provided in this disclosure is complete and accurate.

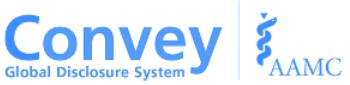

**Disclosure Purpose:** 21-06599

**Summary of Interests**

I do not have any interests to disclose at this time.

**Additional Questions:**

- 1. **Are there other relationships or activities that readers could perceive to have influenced, or that give the appearance of potentially influencing, what you wrote in the submitted work?**  
No.
- 2. **What is the manuscript title?**  
Effectiveness of the Pfizer-BioNTECH and Moderna COVID-19 vaccines among HCP
- 3. **Are you the corresponding author?**  
No.

**Certification**

I certify that the information provided in this disclosure is complete and accurate.





**Disclosure Purpose:** 21-06599

**Summary of Interests**

I do not have any interests to disclose at this time.

**Additional Questions:**

- 1. **Are there other relationships or activities that readers could perceive to have influenced, or that give the appearance of potentially influencing, what you wrote in the submitted work?**  
No.
- 2. **What is the manuscript title?**  
Effectiveness of the Pfizer-BioNTech and Moderna COVID-19 Vaccines among Healthcare Personnel in the United States, January - May 2021
- 3. **Are you the corresponding author?**  
No.

**Certification**

I certify that the information provided in this disclosure is complete and accurate.



**Disclosure Purpose:** 21-06599

Summary of Interests

I do not have any interests to disclose at this time.

Additional Questions:

- 1. **Are there other relationships or activities that readers could perceive to have influenced, or that give the appearance of potentially influencing, what you wrote in the submitted work?**  
No.
- 2. **What is the manuscript title?**  
Effectiveness of the Pfizer-BioNTech and Moderna COVID-19 Vaccines among Healthcare Personnel in the United States, January - May 2021
- 3. **Are you the corresponding author?**  
No.

Certification

I certify that the information provided in this disclosure is complete and accurate.



**Disclosure Purpose:** 21-06599

**Summary of Interests**

I do not have any interests to disclose at this time.

**Additional Questions:**

- 1. **Are there other relationships or activities that readers could perceive to have influenced, or that give the appearance of potentially influencing, what you wrote in the submitted work?**  
No.
- 2. **What is the manuscript title?**  
Effectiveness of the Pfizer-BioNTech and Moderna COVID-19 Vaccines among Healthcare Personnel in the United States, January - May 2021
- 3. **Are you the corresponding author?**  
No.

**Certification**

I certify that the information provided in this disclosure is complete and accurate.



**Disclosure Purpose:** 21-06599

**Summary of Interests**

I do not have any interests to disclose at this time.

**Additional Questions:**

- 1. **Are there other relationships or activities that readers could perceive to have influenced, or that give the appearance of potentially influencing, what you wrote in the submitted work?**  
No.
- 2. **What is the manuscript title?**  
Effectiveness of the Pfizer-BioNTech and Moderna COVID-19 Vaccines among Healthcare Personnel in the United States, January - May 2021
- 3. **Are you the corresponding author?**  
No.

**Certification**

I certify that the information provided in this disclosure is complete and accurate.



Disclosure Purpose: 21-06599

Summary of Interests

**Company or Organization**

| Entity                                                                                                                                                                      | Type             | Interest Held By                                                               |
|-----------------------------------------------------------------------------------------------------------------------------------------------------------------------------|------------------|--------------------------------------------------------------------------------|
| National Institutes of Health                                                                                                                                               | Grant / Contract | Self                                                                           |
| <i>Recipient Name:</i> Jennie H Kwon<br><i>Grant / Contract Description:</i> Dr. Kwon is supported by the NIH (NIAID) grant 5K23AI137321.<br><i>Additional Information:</i> |                  | <i>Recipient Type:</i> Individual<br><i>Grant / Contract Purpose:</i> Research |

Additional Questions:

- Are there other relationships or activities that readers could perceive to have influenced, or that give the appearance of potentially influencing, what you wrote in the submitted work?**  
No.
- What is the manuscript title?**  
Effectiveness of the Pfizer-BioNTech and Moderna COVID-19 Vaccines among Healthcare Personnel in the United States, January - May 2021
- Are you the corresponding author?**  
No.

Certification

I certify that the information provided in this disclosure is complete and accurate.

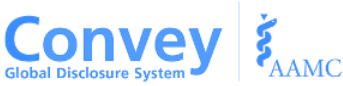

Disclosure Purpose: 21-06599

## Summary of Interests

## Company or Organization

| Entity                                                                                                                                                                                    | Type                                                                            | Interest Held By |
|-------------------------------------------------------------------------------------------------------------------------------------------------------------------------------------------|---------------------------------------------------------------------------------|------------------|
| <a href="#">Centers for Disease Control and Prevention</a>                                                                                                                                | Grant / Contract                                                                | Self             |
| <i>Recipient Name:</i> California Emerging Infections Program<br><i>Grant / Contract Description:</i> Emerging Infections Program Cooperative Agreement<br><i>Additional Information:</i> | <i>Recipient Type:</i> Institution<br><i>Grant / Contract Purpose:</i> Research |                  |

## Additional Questions:

- Are there other relationships or activities that readers could perceive to have influenced, or that give the appearance of potentially influencing, what you wrote in the submitted work?**  
No.
- What is the manuscript title?**  
Effectiveness of the Pfizer-BioNTech and Moderna COVID-19 Vaccines among Healthcare Personnel in the United States, January - May 2021
- Are you the corresponding author?**  
No.

## Certification

I certify that the information provided in this disclosure is complete and accurate.

**Disclosure Purpose:** 21-06599

**Summary of Interests**

I do not have any interests to disclose at this time.

**Additional Questions:**

- 1. **Are there other relationships or activities that readers could perceive to have influenced, or that give the appearance of potentially influencing, what you wrote in the submitted work?**  
No.
- 2. **What is the manuscript title?**  
Effectiveness of the Pfizer-BioNTech and Moderna COVID 19 Vaccines among HCP
- 3. **Are you the corresponding author?**  
No.

**Certification**

I certify that the information provided in this disclosure is complete and accurate.



**Disclosure Purpose:** 21-06599

**Summary of Interests**

I do not have any interests to disclose at this time.

**Additional Questions:**

- 1. **Are there other relationships or activities that readers could perceive to have influenced, or that give the appearance of potentially influencing, what you wrote in the submitted work?**  
No.
- 2. **What is the manuscript title?**  
Effectiveness of the Pfizer-BioNTech and Moderna COVID-19 Vaccines among Healthcare Personnel in the United States, January - May 2021
- 3. **Are you the corresponding author?**  
No.

**Certification**

I certify that the information provided in this disclosure is complete and accurate.



**Disclosure Purpose:** 21-06599

Summary of Interests

I do not have any interests to disclose at this time.

Additional Questions:

- 1. **Are there other relationships or activities that readers could perceive to have influenced, or that give the appearance of potentially influencing, what you wrote in the submitted work?**  
No.
- 2. **What is the manuscript title?**  
Effectiveness of the Pfizer BioNTech and Moderna COVID-19 Vaccines among Healthcare Personnel in the United States, January-May 2021.
- 3. **Are you the corresponding author?**  
No.

Certification

I certify that the information provided in this disclosure is complete and accurate.



**Disclosure Purpose:** 21-06599

Summary of Interests

I do not have any interests to disclose at this time.

Additional Questions:

- 1. **Are there other relationships or activities that readers could perceive to have influenced, or that give the appearance of potentially influencing, what you wrote in the submitted work?**  
No.
- 2. **What is the manuscript title?**  
Effectiveness of the Pfizer-BioNTech and Moderna COVID-19 Vaccines among Healthcare Personnel in the United States, January - May 2021
- 3. **Are you the corresponding author?**  
No.

Certification

I certify that the information provided in this disclosure is complete and accurate.

Disclosure Purpose: 21-06599

Summary of Interests

**Company or Organization**

| Entity                                                        | Type       | Interest Held By                                                                    |
|---------------------------------------------------------------|------------|-------------------------------------------------------------------------------------|
| AllerGen                                                      | Consultant | Self                                                                                |
| <i>Category:</i> Consultant<br><i>Additional Information:</i> |            | <i>Description:</i> served as part of an antibiotic focus group and speakers bureau |

Additional Questions:

- Are there other relationships or activities that readers could perceive to have influenced, or that give the appearance of potentially influencing, what you wrote in the submitted work?**  
No.
- What is the manuscript title?**  
Effectiveness of the Pfizer-BioNTech and Moderna COVID-19 Vaccines among HCP
- Are you the corresponding author?**  
No.

Certification

I certify that the information provided in this disclosure is complete and accurate.

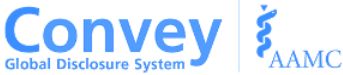

**Disclosure Purpose:** 21-06599

**Summary of Interests**

I do not have any interests to disclose at this time.

**Additional Questions:**

- 1. **Are there other relationships or activities that readers could perceive to have influenced, or that give the appearance of potentially influencing, what you wrote in the submitted work?**  
No.
- 2. **What is the manuscript title?**  
Effectiveness of the Pfizer-BioNTech and Moderna COVID-19 Vaccines among Healthcare Personnel in the United States, January - May 2021
- 3. **Are you the corresponding author?**  
No.

**Certification**

I certify that the information provided in this disclosure is complete and accurate.

**Disclosure Purpose:** 21-06599

### Summary of Interests

I do not have any interests to disclose at this time.

### Additional Questions:

- Are there other relationships or activities that readers could perceive to have influenced, or that give the appearance of potentially influencing, what you wrote in the submitted work?**  
No.
- What is the manuscript title?**  
Effectiveness of the Pfizer-BioNTech and Moderna COVID-19 Vaccines among Healthcare Personnel in the United States, January - May 2021
- Are you the corresponding author?**  
No.

### Certification

I certify that the information provided in this disclosure is complete and accurate.

**Disclosure Purpose:** 21-06599

Summary of Interests

I do not have any interests to disclose at this time.

Additional Questions:

- 1. **Are there other relationships or activities that readers could perceive to have influenced, or that give the appearance of potentially influencing, what you wrote in the submitted work?**  
No.
- 2. **What is the manuscript title?**  
Effectiveness of the Pfizer-BioNTech and Moderna COVID-19 Vaccines among Healthcare Personnel in the United States, January - May 2021
- 3. **Are you the corresponding author?**  
No.

Certification

I certify that the information provided in this disclosure is complete and accurate.



Disclosure Purpose: 21-06599

Summary of Interests

**Company or Organization**

| Entity                                     | Type             | Interest Held By                                                                                                           |
|--------------------------------------------|------------------|----------------------------------------------------------------------------------------------------------------------------|
| Centers for Disease Control and Prevention | Grant / Contract | Other - University of Utah received funding to complete the vaccine effectiveness in healthcare personnel research project |

*Recipient Name:* University of Utah  
*Grant / Contract Description:* SHEPheRD which is a Centers for Disease Control contract for research  
*Additional Information:* The University of Utah received funding of \$500,000 (\$366,300 direct and \$133,700 indirect) - the work from this research effort was included in the manuscript submitted to the NEJM.

*Recipient Type:* Institution  
*Grant / Contract Purpose:* Research

Additional Questions:

- Are there other relationships or activities that readers could perceive to have influenced, or that give the appearance of potentially influencing, what you wrote in the submitted work?**  
No.
- What is the manuscript title?**  
Effectiveness of the Pfizer-BioNTech and Moderna COVID-19 Vaccines among Healthcare Personnel in the United States, January - May 2021
- Are you the corresponding author?**  
No.

Certification

I certify that the information provided in this disclosure is complete and accurate.

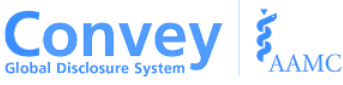

**Disclosure Purpose:** 21-06599

### Summary of Interests

I do not have any interests to disclose at this time.

### Additional Questions:

- Are there other relationships or activities that readers could perceive to have influenced, or that give the appearance of potentially influencing, what you wrote in the submitted work?**  
No.
- What is the manuscript title?**  
Effectiveness of the Pfizer-BioNTech and Moderna COVID-19 Vaccines among Healthcare Personnel in the United States, January - May 2021
- Are you the corresponding author?**  
No.

### Certification

I certify that the information provided in this disclosure is complete and accurate.



**Disclosure Purpose:** 21-06599

## Summary of Interests

| Entity                                                                                                                                                                             | Type             | Interest Held By                                                                |
|------------------------------------------------------------------------------------------------------------------------------------------------------------------------------------|------------------|---------------------------------------------------------------------------------|
| <a href="#">BeiGene USA, Inc.</a>                                                                                                                                                  | Grant / Contract | Self                                                                            |
| <i>Recipient Name:</i> Olive View-UCLA Education and Research Institute<br><i>Grant / Contract Description:</i> Clinical Trial<br><i>Additional Information:</i> Site Investigator |                  | <i>Recipient Type:</i> Institution<br><i>Grant / Contract Purpose:</i> Research |
| <a href="#">Contrafect</a>                                                                                                                                                         | Grant / Contract | Self                                                                            |
| <i>Recipient Name:</i> Olive View-UCLA Education and Research Institute<br><i>Grant / Contract Description:</i> Clinical Trial<br><i>Additional Information:</i> Site Investigator |                  | <i>Recipient Type:</i> Institution<br><i>Grant / Contract Purpose:</i> Research |
| <a href="#">I-Mab</a>                                                                                                                                                              | Grant / Contract | Self                                                                            |
| <i>Recipient Name:</i> Olive View-UCLA Education and Research Institute<br><i>Grant / Contract Description:</i> Clinical Trial<br><i>Additional Information:</i> Site Investigator |                  | <i>Recipient Type:</i> Institution<br><i>Grant / Contract Purpose:</i> Research |
| <a href="#">Light AI</a>                                                                                                                                                           | Consultant       | Self                                                                            |
| <i>Category:</i> Consultant<br><i>Additional Information:</i>                                                                                                                      |                  | <i>Description:</i> Consultant for clinical research                            |
| <a href="#">Light AI</a>                                                                                                                                                           | Stock            | Self                                                                            |
| <i>Additional Information:</i>                                                                                                                                                     |                  |                                                                                 |
| <a href="#">Nabriva Therapeutics, plc</a>                                                                                                                                          | Grant / Contract | Self                                                                            |
| <i>Recipient Name:</i> Olive View-UCLA Education and Research Institute<br><i>Grant / Contract Description:</i> Clinical Trial<br><i>Additional Information:</i> Site Investigator |                  | <i>Recipient Type:</i> Institution<br><i>Grant / Contract Purpose:</i> Research |

## Additional Questions:

- Are there other relationships or activities that readers could perceive to have influenced, or that give the appearance of potentially influencing, what you wrote in the submitted work?**  
No.
- What is the manuscript title?**  
Effectiveness of the Pfizer-BioNTech and Moderna COVID-19 Vaccines among Healthcare Personnel in the United States, January - May 2021
- Are you the corresponding author?**  
No.

## Certification

I certify that the information provided in this disclosure is complete and accurate.

**Disclosure Purpose:** 21-06599

**Summary of Interests**

I do not have any interests to disclose at this time.

**Additional Questions:**

- 1. **Are there other relationships or activities that readers could perceive to have influenced, or that give the appearance of potentially influencing, what you wrote in the submitted work?**  
No.
- 2. **What is the manuscript title?**  
Effectiveness of the Pfizer-BioNTech and Moderna COVID-19 Vaccines among Healthcare Personnel in the United States, January - May 2021
- 3. **Are you the corresponding author?**  
No.

**Certification**

I certify that the information provided in this disclosure is complete and accurate.



**Disclosure Purpose:** 21-06599

**Summary of Interests**

I do not have any interests to disclose at this time.

**Additional Questions:**

- 1. **Are there other relationships or activities that readers could perceive to have influenced, or that give the appearance of potentially influencing, what you wrote in the submitted work?**  
No.
- 2. **What is the manuscript title?**  
Effectiveness of the Pfizer-BioNTech and Moderna COVID-19 Vaccines among Healthcare Personnel in the United States, January - May 2021
- 3. **Are you the corresponding author?**  
No.

**Certification**

I certify that the information provided in this disclosure is complete and accurate.

Disclosure Purpose: 21-06599

## Summary of Interests

### Company or Organization

| Entity                                                                                                                                                                     | Type             | Interest Held By                                                                                                                        |
|----------------------------------------------------------------------------------------------------------------------------------------------------------------------------|------------------|-----------------------------------------------------------------------------------------------------------------------------------------|
| Centers for Disease Control and Prevention                                                                                                                                 | Grant / Contract | Self                                                                                                                                    |
| <i>Recipient Name:</i> Oregon Health Authority<br><i>Grant / Contract Description:</i> Emerging Infections Program Cooperative Agreement<br><i>Additional Information:</i> |                  | <i>Recipient Type:</i> Institution<br><i>Grant / Contract Purpose:</i> Other - State Cooperative Agreement                              |
| Centers for Disease Control and Prevention                                                                                                                                 | Grant / Contract | Self                                                                                                                                    |
| <i>Recipient Name:</i> Oregon Health Authority<br><i>Grant / Contract Description:</i> Epidemiology and Laboratory Capacity Grant<br><i>Additional Information:</i>        |                  | <i>Recipient Type:</i> Institution<br><i>Grant / Contract Purpose:</i> Other - State public health grant                                |
| THE SOCIETY FOR HEALTHCARE EPIDEMIOLOGY OF AMERICA                                                                                                                         | Gift             | Self                                                                                                                                    |
| <i>Description:</i> Committee Honorarium                                                                                                                                   |                  | <i>Additional Information:</i> 3-5 hours per month during 2019 serving as member on LEAP fellowship steering committee. \$1250 stipend. |

### Additional Questions:

- Are there other relationships or activities that readers could perceive to have influenced, or that give the appearance of potentially influencing, what you wrote in the submitted work?**

No.
- What is the manuscript title?**

Effectiveness of the Pfizer-BioNTech and Moderna COVID-19 Vaccines among Healthcare Personnel in the United States, January-May 2021
- Are you the corresponding author?**

No.

### Certification

I certify that the information provided in this disclosure is complete and accurate.

Disclosure Purpose: 21-06599

## Summary of Interests

I do not have any interests to disclose at this time.

## Additional Questions:

1. **Are there other relationships or activities that readers could perceive to have influenced, or that give the appearance of potentially influencing, what you wrote in the submitted work?**

No.

2. **What is the manuscript title?**

mRNA COVID-19 Vaccine Effectiveness among Healthcare Personnel in the US

3. **Are you the corresponding author?**

Yes.

- a. **Please list the other authors' names here.**

Ryan Gierke, Katherine E. Fleming-Dutra, Jennifer L. Farrar, Nicholas M. Mohr, David A. Talan, Anusha Krishnadasan, Karisa K. Harland, Howard A. Smithline, Peter C. Hou, Lilly C. Lee, Stephen C. Lim; Gregory J. Moran, Elizabeth Krebs, Mark T. Steele, David G. Beiser, Brett Faine, John P. Haran, Utsav Nandi, Walter A. Schradang, Brian Chinnock, Daniel J. Henning, Frank LoVecchio, Jane Lee, Devra Barter, Monica Brackney, Scott K. Fridkin; Kaytlynn Marceaux-Galli, Sarah Lim, Erin C. Phipps, Ghinwa Dumyati, Rebecca Pierce, Tiffanie M. Markus, Deverick J. Anderson, Amanda K. Debes, Michael Y. Lin, Jeanmarie Mayer, Jennie H. Kwon, Nasia Safdar, Marc Fischer, Rosalyn Singleton ; Nora Chea, Shelley S. Magill, Jennifer Verani, Stephanie Schrag

## Certification

I certify that the information provided in this disclosure is complete and accurate.

**Disclosure Purpose:** 21-06599

**Summary of Interests**

I do not have any interests to disclose at this time.

**Additional Questions:**

- Are there other relationships or activities that readers could perceive to have influenced, or that give the appearance of potentially influencing, what you wrote in the submitted work?**  
No.
- What is the manuscript title?**  
Effectiveness of the Pfizer-BioNTech and Moderna COVID-19 Vaccines among Healthcare Personnel in the United States, January - May 2021
- Are you the corresponding author?**  
No.

**Certification**

I certify that the information provided in this disclosure is complete and accurate.



**Disclosure Purpose:** 21-06599

### Summary of Interests

I do not have any interests to disclose at this time.

### Additional Questions:

- Are there other relationships or activities that readers could perceive to have influenced, or that give the appearance of potentially influencing, what you wrote in the submitted work?**  
No.
- What is the manuscript title?**  
Effectiveness of the Pfizer-BioNTech and Moderna COVID-19 Vaccines among Healthcare Personnel in the United States, January - May 2021
- Are you the corresponding author?**  
No.

### Certification

I certify that the information provided in this disclosure is complete and accurate.

**Disclosure Purpose:** 21-06599

Summary of Interests

I do not have any interests to disclose at this time.

Additional Questions:

- 1. **Are there other relationships or activities that readers could perceive to have influenced, or that give the appearance of potentially influencing, what you wrote in the submitted work?**  
No.
- 2. **What is the manuscript title?**  
Effectiveness of the Pfizer-BioNTech and Moderna COVID-19 Vaccines among Healthcare Personnel in the United States, January - May 2021
- 3. **Are you the corresponding author?**  
No.

Certification

I certify that the information provided in this disclosure is complete and accurate.





**Disclosure Purpose:** 21-06599

### Summary of Interests

I do not have any interests to disclose at this time.

### Additional Questions:

- Are there other relationships or activities that readers could perceive to have influenced, or that give the appearance of potentially influencing, what you wrote in the submitted work?**  
No.
- What is the manuscript title?**  
Effectiveness of the Pfizer-BioNTech and Moderna COVID-19 Vaccines Among Healthcare Personnel in the United States, January - May 2021
- Are you the corresponding author?**  
No.

### Certification

I certify that the information provided in this disclosure is complete and accurate.

**Disclosure Purpose:** 21-06599

### Summary of Interests

I do not have any interests to disclose at this time.

### Additional Questions:

- Are there other relationships or activities that readers could perceive to have influenced, or that give the appearance of potentially influencing, what you wrote in the submitted work?**  
No.
- What is the manuscript title?**  
Effectiveness of the Pfizer-BioNTech and Moderna COVID-19 Vaccines among Healthcare Personnel in the United States, January - May 2021
- Are you the corresponding author?**  
No.

### Certification

I certify that the information provided in this disclosure is complete and accurate.

Disclosure Purpose: 21-06599

Summary of Interests

**Company or Organization**

| Entity                                                                                     | Type       | Interest Held By                                                                                       |
|--------------------------------------------------------------------------------------------|------------|--------------------------------------------------------------------------------------------------------|
| Light AI                                                                                   | Consultant | Self                                                                                                   |
| <i>Category:</i> Consultant<br><i>Additional Information:</i> 90-minute meeting to discuss |            | <i>Description:</i> Received \$500 honorarium for consulting on a new device to diagnose strept throat |

Additional Questions:

- Are there other relationships or activities that readers could perceive to have influenced, or that give the appearance of potentially influencing, what you wrote in the submitted work?**  
No.
- What is the manuscript title?**  
Effectiveness of the Pfizer-BioNTech and Moderna COVID-19 Vaccines among HCP
- Are you the corresponding author?**  
No.

Certification

I certify that the information provided in this disclosure is complete and accurate.

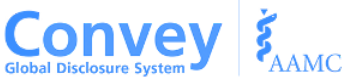

**Disclosure Purpose:** 21-06599

**Summary of Interests**

I do not have any interests to disclose at this time.

**Additional Questions:**

- 1. **Are there other relationships or activities that readers could perceive to have influenced, or that give the appearance of potentially influencing, what you wrote in the submitted work?**  
No.
- 2. **What is the manuscript title?**  
Effectiveness of the Pfizer-BioNTech and Moderna COVID-19 Vaccines among Healthcare Personnel in the United States, January - May 2021
- 3. **Are you the corresponding author?**  
No.

**Certification**

I certify that the information provided in this disclosure is complete and accurate.



**Disclosure Purpose:** 21-06599

Summary of Interests

I do not have any interests to disclose at this time.

Additional Questions:

- 1. **Are there other relationships or activities that readers could perceive to have influenced, or that give the appearance of potentially influencing, what you wrote in the submitted work?**  
No.
- 2. **What is the manuscript title?**  
Effectiveness of the Pfizer-BioNTech and Moderna COVID-19 Vaccines among Healthcare Personnel in the United States, January - May 2021
- 3. **Are you the corresponding author?**  
No.

Certification

I certify that the information provided in this disclosure is complete and accurate.
